# Supplementary material
Source: PubMed Central journal article supplement (PMC3937778)
Supplement: supp_127.5.1128_JCS144097.pdf [file supp_127.5.1128_JCS144097.pdf]

**Table S1. Yeast Strains used in this study**

| Strain | Relevant Genotype                                            | <i>iqg1</i> Mutations                                                                           |
|--------|--------------------------------------------------------------|-------------------------------------------------------------------------------------------------|
| SN001  | WT background strain                                         | WT                                                                                              |
| SN143  | <i>cdk1-as</i>                                               | WT                                                                                              |
| SN312  | <i>IQG1</i> ,<br><i>SPC42-mCherry</i>                        | WT                                                                                              |
| SN313  | <i>iqg1-14A</i> ,<br><i>SPC42-mCherry</i>                    | S7A, T30A, S49A, T225A, S268A, T299A, T315A,<br>S317A, T338A, T348A, S354A, S365A, S399A, S404A |
| SN314  | <i>iqg1-11A</i> ,<br><i>SPC42-mCherry</i>                    | T225A, S268A, T299A, T315A, S317A, T338A,<br>T348A, S354A, S365A, S399A, S404A                  |
| SN315  | <i>iqg1-3A</i> ,<br><i>SPC42-mCherry</i>                     | S7A, T30A, S49A                                                                                 |
| SN158  | <i>iqg1-6A</i> ,<br><i>SPC42-mCherry</i>                     | S919A, S956A, S961A, S1120A, S1122A, S1347A                                                     |
| SN320  | <i>IQG1-eGFP</i> ,<br><i>SPC42-mCherry</i>                   | WT                                                                                              |
| SN321  | <i>iqg1-14A-eGFP</i> ,<br><i>SPC42-mCherry</i>               | S7A, T30A, S49A, T225A, S268A, T299A, T315A,<br>S317A, T338A, T348A, S354A, S365A, S399A, S404A |
| SN322  | <i>iqg1-11A-eGFP</i> ,<br><i>SPC42-mCherry</i>               | T225A, S268A, T299A, T315A, S317A, T338A,<br>T348A, S354A, S365A, S399A, S404A                  |
| SN323  | <i>iqg1-3A-eGFP</i> ,<br><i>SPC42-mCherry</i>                | S7A, T30A, S49A                                                                                 |
| SN324  | <i>HOF1-eGFP</i> , <i>IQG1</i> ,<br><i>SPC42-mCherry</i>     | WT                                                                                              |
| SN342  | <i>HOF1-eGFP</i> , <i>iqg1-14A</i> ,<br><i>SPC42-mCherry</i> | S7A, T30A, S49A, T225A, S268A, T299A, T315A,<br>S317A, T338A, T348A, S354A, S365A, S399A, S404A |
| SN326  | <i>HOF1-eGFP</i> , <i>iqg1-11A</i> ,<br><i>SPC42-mCherry</i> | T225A, S268A, T299A, T315A, S317A, T338A,<br>T348A, S354A, S365A, S399A, S404A                  |
| SN327  | <i>HOF1-eGFP</i> , <i>iqg1-3A</i> ,<br><i>SPC42-mCherry</i>  | S7A, T30A, S49A                                                                                 |

**Table S2. Plasmids used in this study**

| Plasmid | Source                        | Features                      |
|---------|-------------------------------|-------------------------------|
| pRS306  |                               | <i>URA3, AmpR</i>             |
| pSGN092 | pRS306 + genomic PCR          | <i>IQG1, URA3, AmpR</i>       |
| pSGN084 | Invitrogen LifeTech           | <i>iqg1-14A</i> (-185 – 1464) |
| pSGN085 | Invitrogen LifeTech           | <i>iqg1-5A</i> (2635 – 3544)  |
| pSGN094 | pSGN092 + pSGN085             | <i>iqg1-6A, URA3, AmpR</i>    |
| pSGN098 | pSGN094 + pSGN084             | <i>iqg1-20A, URA3, AmpR</i>   |
| pSGN109 | pSGN092 + pSGN098             | <i>iqg1-11A, URA3, AmpR</i>   |
| pSGN111 | pSGN092 + pSGN098             | <i>iqg1-3A, URA3, AmpR</i>    |
| pYM28   | PCR Toolbox II (John Pringle) | <i>eGFP, HIS3MX6, AmpR</i>    |
| pSGN099 |                               | <i>mCherry, kanMX, AmpR</i>   |

**Table S3 (A) Mass Spectrometric Analysis of Band Identified as Mlc1**

| Rank | # Unique Peptides | % Coverage | Protein MW (kDa) | Species                | Protein Name | Systematic Name (Yeast) |
|------|-------------------|------------|------------------|------------------------|--------------|-------------------------|
| 1    | 9                 | 53.0       | 16.4             | <i>S. cerevisiae</i>   | Mlc1         | YGL106W                 |
| 2    | 5                 | 11.3       | 58.8             | <i>H. sapiens</i>      | Keratin I    | N/A                     |
| 3    | 5                 | 11.5       | 66.0             | <i>H. sapiens</i>      | Keratin II   | N/A                     |
| 4    | 5                 | 42.3       | 14.5             | <i>S. cerevisiae</i>   | Rps14A       | YCR031C                 |
| 5    | 4                 | 25.3       | 15.3             | <i>S. cerevisiae</i>   | Rps24A       | YER074W                 |
| 6    | 2                 | 17.0       | 16.1             | <i>S. cerevisiae</i>   | Cmd1         | YBR109C                 |
| 7    | 2                 | 13.0       | 24.4             | <i>S. scrofa</i>       | Trypsin      | N/A                     |
| 8    | 3                 | 28.8       | 17.0             | <i>S. cerevisiae</i>   | Rps18A       | YDR045W                 |
| 9    | 1                 | 2.0        | 70.9             | <i>M. musculus</i>     | Keratin II   | N/A                     |
| 10   | 2                 | 14.2       | 14.2             | <i>S. cerevisiae</i>   | Rpl26A       | YLR344W                 |
| 11   | 1                 | 5.4        | 22.3             | <i>H. brasiliensis</i> | Rubber       | N/A                     |
| 12   | 1                 | 8.0        | 14.7             | <i>H. brasiliensis</i> | Rubber EF    | N/A                     |
| 13   | 1                 | 1.8        | 62.1             | <i>H. sapiens</i>      | Keratin I    | N/A                     |
| 14   | 2                 | 19.2       | 13.9             | <i>S. cerevisiae</i>   | Rpl35A       | YDL191W                 |

**Table S3 (B) Mass Spectrometric Analysis of Band Identified as Hof1**

| Rank | # Unique Peptides | % Coverage | Protein MW (kDa) | Species              | Protein Name | Systematic Name (Yeast) |
|------|-------------------|------------|------------------|----------------------|--------------|-------------------------|
| 1    | 25                | 37.7       | 76.2             | <i>S. cerevisiae</i> | Hof1         | YMR032W                 |
| 2    | 8                 | 10.7       | 99.6             | <i>S. cerevisiae</i> | Pma1         | YGL008C                 |
| 3    | 7                 | 11.6       | 81.4             | <i>S. cerevisiae</i> | Hsp82        | YPL240C                 |
| 4    | 7                 | 4.9        | 172.8            | <i>S. cerevisiae</i> | Iqg1         | YPL242C                 |
| 5    | 4                 | 8.7        | 69.7             | <i>S. cerevisiae</i> | Ssa1         | YAL005C                 |
| 6    | 2                 | 4.1        | 69.3             | <i>B. taurus</i>     | BSA          | N/A                     |
| 7    | 2                 | 12.1       | 24.4             | <i>S. scrofa</i>     | Trypsin      | N/A                     |
| 8    | 1                 | 3.4        | 36.9             | <i>S. cerevisiae</i> | Adh1         | YOL086C                 |
| 9    | 3                 | 4.5        | 77.4             | <i>S. cerevisiae</i> | Sse1         | YPL106C                 |
| 10   | 1                 | 1.8        | 80.8             | <i>S. cerevisiae</i> | Gus1         | YGL245W                 |
| 11   | 2                 | 3.1        | 92.3             | <i>S. cerevisiae</i> | Ubp5         | YER144C                 |
| 12   | 1                 | 2.4        | 50.6             | <i>A. salina</i>     | EF-1-alpha   | N/A                     |
| 13   | 1                 | 2.7        | 46.8             | <i>S. cerevisiae</i> | Eno1         | YGR254W                 |
| 14   | 1                 | 1.4        | 78.2             | <i>S. cerevisiae</i> | Grs1         | YBR121C                 |
| 15   | 1                 | 1.2        | 85.7             | <i>S. cerevisiae</i> | Mes1         | YGR264C                 |

Visible GelCode Blue-stained protein bands were excised for in-gel trypsin digest, HPLC fractionation, and linear ion trap – Orbitrap hybrid tandem mass spectrometry. **(A)** Analysis of the major lower MW band identified Mlc1 (P53141) as the major component (identified from 9 unique peptides, providing 53% sequence coverage). **(B)** Analysis of the higher MW band identified Hof1 (Q05080) as the major component (from 25 unique peptides, providing ~38% sequence coverage). These proteins were confirmed as unique interactors with the Iqg1-eGFP bait by comparison of the full protein content of the experimental IP with that from a control IP with a strain lacking Iqg1 (data not shown).
